# Supplementary material for: Piglet cardiopulmonary bypass induces intestinal dysbiosis and barrier dysfunction associated with systemic inflammation
Source: PubMed Central journal article supplement (PMC9844230; doi:10.1242/dmm.049742), 2023-01-12
Supplement: dmm-16-049742-s1.pdf [file dmm-16-049742-s1.pdf]

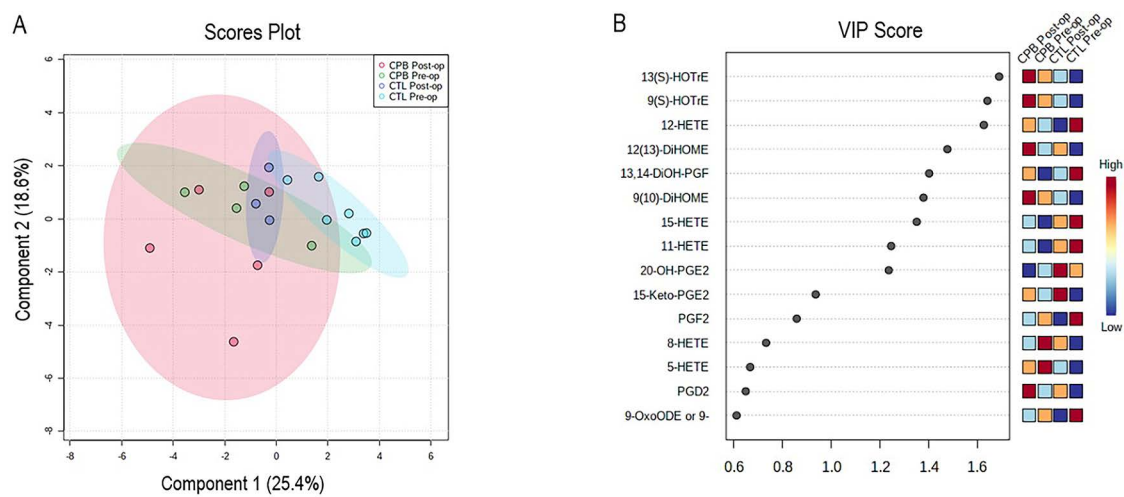

**Fig. S2. Partial least squares discriminate analysis and VIP scoring for Stool Eicosanoids in the CPB/DHCA Group and Controls.** Panel A shows a two dimensional score plot with differences between the two groups and time points for each group. Panel B shows a VIP score for different eicosanoids in each group based upon the results from the PLS-DA model. CPB, Cardiopulmonary bypass; CTL, Control; VIP, Variable importance in PLS-DA model.

**Table S1. Hemodynamic Support and Vasoactive Inotrope Score Following CPB**

| <b>Piglets</b>   | <b>Vasoactive Inotrope Score</b> | <b>Milrinone mcg/kg/min</b> | <b>Dopamine mcg/kg/min</b> | <b>Epinephrine mcg/kg/min</b> | <b>Vasopressin mcg/kg/min</b> | <b>Event</b>   |
|------------------|----------------------------------|-----------------------------|----------------------------|-------------------------------|-------------------------------|----------------|
| <b>Piglet #1</b> |                                  |                             |                            |                               |                               |                |
| Hour 0           | 12                               | 0.5                         | 2                          | 0.05                          | 0                             | Off bypass     |
| Hour 1           | 20                               | 0.5                         | 2                          | 0.08                          | 0.0005                        |                |
| Hour 2           | 23                               | 0.3                         | 2                          | 0.08                          | 0.001                         |                |
| Hour 3           | 23                               | 0.3                         | 2                          | 0.08                          | 0.001                         |                |
| Hour 4           | 23                               | 0.3                         | 2                          | 0.08                          | 0.001                         | Pre-euthanasia |
| <b>Piglet #2</b> |                                  |                             |                            |                               |                               |                |
| Hour 0           | 19                               | 0.5                         | 5                          | 0.09                          | 0                             | Off bypass     |
| Hour 1           | 19                               | 0.5                         | 5                          | 0.09                          | 0                             |                |
| Hour 2           | 19                               | 0.5                         | 5                          | 0.09                          | 0                             |                |
| Hour 3           | 19                               | 0.5                         | 5                          | 0.09                          | 0                             |                |
| Hour 4           | 19                               | 0.5                         | 5                          | 0.09                          | 0                             | Pre-euthanasia |
| <b>Piglet #3</b> |                                  |                             |                            |                               |                               |                |
| Hour 0           | 15                               | 0.5                         | 5                          | 0.05                          | 0                             | Off bypass     |
| Hour 1           | 15                               | 0.5                         | 5                          | 0.05                          | 0                             |                |
| Hour 2           | 15                               | 0.5                         | 5                          | 0.05                          | 0                             |                |
| Hour 3           | 16                               | 0.3                         | 5                          | 0.08                          | 0                             |                |
| Hour 4           | 16                               | 0.3                         | 5                          | 0.08                          | 0                             | Pre-euthanasia |
| <b>Piglet #4</b> |                                  |                             |                            |                               |                               |                |
| Hour 0           | 12.7                             | 0.5                         | 2                          | 0.05                          | 0                             | Off bypass     |
| Hour 1           | 10.7                             | 0.3                         | 2                          | 0.05                          | 0                             |                |
| Hour 2           | 10.7                             | 0.3                         | 2                          | 0.05                          | 0                             |                |
| Hour 3           | 10.7                             | 0.3                         | 2                          | 0.05                          | 0                             |                |
| Hour 4           | 10.7                             | 0.3                         | 2                          | 0.05                          | 0                             | Pre-euthanasia |
| <b>Piglet #5</b> |                                  |                             |                            |                               |                               |                |
| Hour 0           | 12                               | 0.5                         | 2                          | 0.05                          | 0                             | Off bypass     |
| Hour 1           | 12                               | 0.5                         | 2                          | 0.05                          | 0                             |                |
| Hour 2           | 10                               | 0.3                         | 2                          | 0.05                          | 0                             |                |
| Hour 3           | 7                                | 0                           | 2                          | 0.05                          | 0                             |                |
| Hour 4           | 7                                | 0                           | 2                          | 0.05                          | 0                             | Pre-euthanasia |

CPB, Cardiopulmonary bypass; mcg, microgram; kg, kilogram; min, minute
